# Bupivacaine Attenuates Contractility by Decreasing Sensitivity of Myofilaments to $\text{Ca}^{2+}$ in Rat Ventricular Muscle

Yasushi Mio, M.D.,\* Norio Fukuda, Ph.D.,† Yoichiro Kusakari, M.D.,† Yasumasa Tanifuji, M.D.,‡ Satoshi Kurihara, M.D., Ph.D.§

**Background:** Bupivacaine exhibits a cardiodepressant effect, the molecular mechanism(s) of which have yet to be fully understood. Bupivacaine may directly act on contractile proteins and thereby decrease myofibrillar  $\text{Ca}^{2+}$  sensitivity.

**Methods:** Rat ventricular muscle was used. First, the effect of bupivacaine was examined on tetanic contractions in isolated intact myocytes. Next, Triton X-100–treated ventricular trabeculae were used to investigate the effect of bupivacaine on the  $\text{pCa}$  ( $= -\log [\text{Ca}^{2+}]$ )–tension relation as well as on maximal  $\text{Ca}^{2+}$ -activated tension. Furthermore, to test whether bupivacaine inhibits the pathway downstream from  $\text{Ca}^{2+}$  binding to troponin C, tension was elicited in the skinned preparations by lowering the Mg-adenosine triphosphate (MgATP) concentration in the absence of  $\text{Ca}^{2+}$ . The effect of bupivacaine on the  $\text{pMgATP}$  ( $= -\log [\text{MgATP}]$ )–tension relation was examined.

**Results:** In myocytes, 3  $\mu\text{M}$  bupivacaine significantly ( $P < 0.01$ ) increased intracellular  $\text{Ca}^{2+}$  concentration required for 5% cell shortening from the resting cell length. In skinned preparations, bupivacaine shifted the  $\text{pCa}$ –tension relation to the lower  $\text{pCa}$  side; the midpoint of the  $\text{pCa}$  curve ( $\text{pCa}_{50}$ ) was significantly ( $P < 0.05$ ) changed by 10 and 100  $\mu\text{M}$  bupivacaine. A highly correlated linear relation ( $R = 0.81$ ;  $P < 0.0005$ ) was present between  $\text{pCa}_{50}$  and maximal  $\text{Ca}^{2+}$ -activated tension. Bupivacaine (10 and 100  $\mu\text{M}$ ) significantly ( $P < 0.05$ ) shifted the midpoint of the  $\text{pMgATP}$ –tension relation to the higher  $\text{pMgATP}$  side.

**Conclusions:** Bupivacaine decreases myofibrillar  $\text{Ca}^{2+}$  sensitivity in ventricular muscle, and this is coupled with the compound's inhibitory effect on the pathway beyond  $\text{Ca}^{2+}$  binding to troponin C, possibly on the actomyosin interaction. The current results may partly explain the overall cardiodepressant effect of bupivacaine *in vivo*.

BUPIVACAINE is one of the most commonly used long-lasting local anesthetics in the clinical setting. It has been reported that high doses of bupivacaine markedly suppress cardiac contractile performance<sup>1–3</sup> and induce arrhythmia,<sup>4–6</sup> which may cause cardiac arrest in humans.<sup>7</sup> The effects of bupivacaine on cardiac muscle contraction have been extensively studied thus far. Accumulating evidence suggests that bupivacaine acts in a

number of specific ways in cardiac muscle, including block of sodium,<sup>8</sup> calcium,<sup>9,10</sup> and potassium<sup>11</sup> channels on the sarcolemma, interference with the  $\text{Ca}^{2+}$ -induced  $\text{Ca}^{2+}$ -release mechanism from the sarcoplasmic reticulum,<sup>12,13</sup> collapse of the mitochondrial transmembrane potential,<sup>14</sup> as well as inhibition of electron transport for oxidative phosphorylation.<sup>15</sup> These effects may synergistically contribute to the overall cardiodepressant effect of bupivacaine. It is also possible, considering the recent findings for halothane and isoflurane,<sup>16,17</sup> that bupivacaine directly acts on contractile proteins and, subsequently, decreases the  $\text{Ca}^{2+}$  sensitivity of cardiac myofilaments.

It has been reported that inhalation anesthetics, such as halothane and isoflurane,<sup>16,17</sup> as well as opioids, such as fentanyl and morphine,<sup>18</sup> decrease myofibrillar  $\text{Ca}^{2+}$  sensitivity in cardiac muscle. Recently, Tavernier *et al.*<sup>16</sup> demonstrated that clinically relevant doses of halothane or isoflurane decrease  $\text{Ca}^{2+}$  sensitivity and suppress maximal  $\text{Ca}^{2+}$ -activated tension production in human skinned cardiac muscle. This finding provides strong evidence that a decrease in myofibrillar  $\text{Ca}^{2+}$  sensitivity, at least in part, underlies the cardiodepressant effect of halothane or isoflurane encountered in the clinical setting.

In the current study, to elucidate whether bupivacaine suppresses the contractile properties of cardiac muscle at the myofilament level, we used two experimental systems using rat ventricular muscle. First,  $\text{Ca}^{2+}$  sensitivity was quantitatively estimated by simultaneously measuring the intracellular  $\text{Ca}^{2+}$  concentration ( $[\text{Ca}^{2+}]_i$ ) and cell shortening in tetanized isolated myocytes. Second, isometric tension, either  $\text{Ca}^{2+}$ -dependent or  $\text{Ca}^{2+}$ -independent, was measured in skinned muscle preparations from which the membrane system had been chemically disrupted by the treatment with 1% (vol/vol) polyethylene glycol mono-p-isoctylphenyl ether (Triton X-100; Nacalai Tesque, Kyoto, Japan) for 60 min. Our results show that bupivacaine suppresses cardiac contractility in both intact and skinned muscle preparations.

## Materials and Methods

All experiments conducted in the current study conform with *The Guiding Principles for the Care and Use of Animals* approved by the Council of the Physiologic Society of Japan.

\* Staff Anesthesiologist, † Professor, Department of Anesthesiology, ‡ Staff Physiologist, § Professor, Department of Physiology (II).

Received from the Departments of Anesthesiology and Physiology (II), The Jikei University School of Medicine, Tokyo, Japan. Submitted for publication January 31, 2002. Accepted for publication June 26, 2002. Supported by Grants-in-Aid for Scientific Research from the Ministry of Education, Culture, Sports, Science and Technology of Japan, Tokyo, Japan (to Drs. Fukuda and Kurihara), by the Vehicle Racing Commemorative Foundation, Tokyo, Japan (to Dr. Kurihara), and by the Japan Heart Foundation, Tokyo, Japan (to Dr. Fukuda). Presented at the 45th Annual Meeting of the Biophysical Society, Boston, Massachusetts, February 21, 2001. The two first authors equally contributed to this work.

Address reprint requests to Dr. Mio: Department of Anesthesiology, The Jikei University School of Medicine, 3-25-8 Nishishinbashi, Minato-ku, Tokyo 105-8461, Japan. Address electronic mail to: mio@jikei.ac.jp. Individual article reprints may be purchased through the Journal Web site, www.anesthesiology.org.

### Preparation of Intact Cardiomyocytes

Myocytes were prepared according to the previously reported procedure.<sup>19,20</sup> Briefly, the hearts were quickly removed from male Wistar rats (weight, 250–350 g), anesthetized with sodium pentobarbital (50 mg/kg administered intraperitoneally), and then perfused with  $\text{Ca}^{2+}$ -free HEPES-Tyrode solution and 0.04 mg/ml protease (Type XIV, Sigma, St. Louis, MO) for 3–4 min using a Langendorff column. Myocytes were isolated using an enzymatic dispersion technique, and the enzymes were washed out with the HEPES-Tyrode solution containing 0.2 mM  $\text{Ca}^{2+}$ . The isolated myocytes were stored in the HEPES-Tyrode solution containing 1 mM  $\text{Ca}^{2+}$  at 4°C before use for up to 8 h.

### Measurement of Intracellular $\text{Ca}^{2+}$ Concentration and Cell Length

Isolated myocytes were bathed in the 1-mM  $\text{Ca}^{2+}$ -HEPES-Tyrode solution containing 4  $\mu\text{M}$  fura-2-AM (Molecular Probes, Eugene, OR) for 10 min at 22°C. The cells were then centrifuged for 40 s at 500 rpm to remove surplus fura-2-AM and to stop further loading of fura-2 into the cells. The fura-2-loaded myocytes were resuspended in the 1 mM  $\text{Ca}^{2+}$ -HEPES-Tyrode solution and placed in a chamber mounted on the stage of an inverted microscope (Diaphot; Nikon, Tokyo, Japan). All experiments were performed in the presence of 1 mM  $\text{Ca}^{2+}$ .<sup>20</sup> Excitation of the dye and detection of the emitted fluorescence from the preparation were essentially the same as described previously.<sup>19,20</sup> Rod-shaped myocytes were excited alternately at 340 and 380 nm at 400 Hz using an epifluorescence system (CAM-230; JASCO, Tokyo, Japan). The resultant fluorescence signals were passed through a  $500 \pm 20$  nm bandpass filter before detecting with a photomultiplier tube (R268; Hamamatsu Photonics, Hamamatsu, Japan). After each experiment, background fluorescence was measured from the control myocyte (without fura-2 loading), which was similar in size to the myocyte used for the fluorescence recording with identical optical arrangement. The ratio of the fluorescence intensities excited at 340 and 380 nm [*i.e.*,  $R = F(340)/F(380)$ ] was calculated after subtracting the background fluorescence. The  $R$  value was converted to the  $[\text{Ca}^{2+}]_i$  using the standard equation with parameters for fura-2 fluorescence:  $R_{\min}$ ,  $R_{\max}$ ,  $\beta$ , and  $K_D$ .<sup>21</sup>  $R_{\min}$  and  $R_{\max}$  values were estimated by a modification of the method of Berlin and Konishi<sup>22</sup> in the cells superfused with the solutions containing ionomycin. The value of  $\beta$  was also estimated in the cells, as described by Bakker *et al.*,<sup>23</sup> from fura-2 fluorescence changes during tetanus. For  $K_D$ , the value estimated *in vitro*, 0.24  $\mu\text{M}$  (ionic strength 170 mM, pH 7.2), was used.

Changes in cell length during tetanus were measured with an edge detector (MOPS-SPL-46A001; Hamamatsu Photonics). Myocytes were transilluminated with long-wavelength light ( $> 600$  nm), and cell images were

projected onto a linear, 612-element photodiode array. Both edges of the myocyte were detected, and the distance between the edges was measured. Four records of the signals for fluorescence and cell length were averaged.

Prior to the induction of tetanus, myocytes were treated with 0.2  $\mu\text{M}$  thapsigargin (Calbiochem, La Jolla, CA) for 10–15 min to abolish the function of the sarcoplasmic reticulum.<sup>24</sup> This thapsigargin treatment did not affect the resting sarcomere length (SL;  $\approx 1.8$   $\mu\text{m}$ ).<sup>20</sup> Myocytes were then stimulated by 10-Hz field stimulation for 10 s.<sup>20</sup> The signals for  $[\text{Ca}^{2+}]_i$  and cell length returned to the baseline values in approximately 40 s in the absence and presence of bupivacaine, and the field stimulation was delivered every minute. As reported previously by us,<sup>20</sup> both signals were stable for more than 1 h, enabling us to examine the effect of bupivacaine without taking into account the effect of the time-dependent rundown in the signals. Changes in fluorescence and cell length were measured simultaneously during tetanus, and an instantaneous plot of  $[\text{Ca}^{2+}]_i$  versus percent cell shortening (Ca-L trajectory) was obtained (a counterclockwise loop). Myofibrillar  $\text{Ca}^{2+}$  sensitivity was quantitatively estimated by  $[\text{Ca}^{2+}]_i$  required for 5% shortening from the resting cell length in the falling phase of the Ca-L trajectory (Ca5%).<sup>20</sup> After measuring the Ca-L trajectory under the control condition in the absence of bupivacaine, myocytes were exposed to the solution containing 1  $\mu\text{M}$  and then 3  $\mu\text{M}$  bupivacaine (Sigma), and Ca-L trajectories were obtained.

The experiments using intact cardiomyocytes were performed at  $22 \pm 2^\circ\text{C}$ .

### Preparation of Skinned Ventricular Trabeculae

Skinned ventricular trabeculae were prepared according to our previously reported procedure.<sup>25</sup> The heart was quickly removed from male Wistar rats (weight, 250–350 g; anesthetized with 50 mg/kg intraperitoneal sodium pentobarbital) and perfused with the  $\text{Ca}^{2+}$ -free Tyrode solution<sup>26</sup> at 30°C. Cylinder-shaped thin trabecular muscles (diameter, 100–150  $\mu\text{m}$ ; length, 1–2 mm) were dissected from the right ventricle in the Tyrode solution.

Trabecular muscles were immersed in the relaxing solution [4 mM Mg-adenosine triphosphate (MgATP), 10 mM 3-(*N*-morpholino)propanesulfonic acid (MOPS), 10 mM EGTA, 1 mM free  $\text{Mg}^{2+}$ , 180 mM ionic strength (adjusted by KCl), pH 7.0] containing 1% (vol/vol) Triton X-100 for 60 min at approximately 2°C to disrupt the membrane system. Preparations were then washed in the relaxing solution to remove Triton X-100 and stored at  $-20^\circ\text{C}$  in the relaxing solution containing 50% (vol/vol) glycerol and 2 mM leupeptin (Peptide Institute, Osaka, Japan) for 1 week or less. Changes in  $\text{Ca}^{2+}$  sensitivity ( $p\text{Ca}_{50}$ ), cooperativity (Hill coefficient), and maximal tension were not noticeable well over 1 week.

### Measurement of Isometric Tension

The experimental apparatus has previously been described in detail.<sup>25</sup> Briefly, both ends of the skinned preparation were tied to tungsten wires with a silk thread. One end was connected to a tension transducer (BG-10; Kulite Semiconductor Products, Leonia, NJ) and the other end to a micromanipulator (Narishige, Tokyo, Japan). SL was adjusted to the slack length (1.9  $\mu\text{m}$ ) by measuring the laser diffraction in the relaxed condition each time before inducing contraction.  $\text{Ca}^{2+}$ -activated isometric tension was measured in solutions containing 4 mM MgATP, 10 mM MOPS, 1 mM free  $\text{Mg}^{2+}$ , various concentrations of free  $\text{Ca}^{2+}$  [adjusted by  $\text{Ca}/(10 \text{ mM EGTA})$ ], 0.1 mM  $\text{P}^1, \text{P}^5$ -di(adenosine5') pentaphosphate, 15 mM creatine phosphate, 15 U/ml creatine phosphokinase at 180 mM ionic strength (adjusted by KCl) (pH 7.0).

Maximal  $\text{Ca}^{2+}$ -activated tension was measured according to a previously described procedure.<sup>27</sup> Just prior to contraction (pCa 4.8), the preparation was bathed in the low-EGTA (1 mM) relaxing solution for approximately 15 s to minimize the buffering effect of EGTA (the low-EGTA relaxing solution was used only for this purpose). Contraction was stopped by transferring the preparation to the relaxing solution containing 10 mM EGTA. This procedure was repeated in the presence of 1, 10, and 100  $\mu\text{M}$  bupivacaine (in this order).

For the estimation of myofibrillar  $\text{Ca}^{2+}$  sensitivity, we measured the pCa-tension relations in the absence and presence of bupivacaine (10 and 100  $\mu\text{M}$ ). pCa-tension relations were obtained by cumulatively increasing the free  $\text{Ca}^{2+}$  concentration from the relaxed condition (pCa > 9) to the maximally activated condition (pCa 4.8).<sup>25</sup> First, the pCa-tension relation was obtained during the control condition in the absence of bupivacaine. This tension measurement was repeated in the presence of 10 and then 100  $\mu\text{M}$  bupivacaine. Each pCa-tension relation was fitted to the Hill equation:

$$\log[P/(100 - P)] = n_H[\text{pCa}_{50} - \text{pCa}]$$

where P is the relative tension expressed as a percentage of the maximum (pCa 4.8),  $n_H$  is the Hill coefficient, and  $\text{pCa}_{50}$  is  $-\log [\text{Ca}^{2+}]$  at  $P = 50\%$ .<sup>25</sup>

At the end of experiment, the preparation was activated in the absence of bupivacaine for measurement of maximal tension or  $\text{Ca}^{2+}$  sensitivity during the control condition.

We further examined the effect of bupivacaine on tension induced by rigor cross-bridges in the absence of  $\text{Ca}^{2+}$  ( $\text{Ca}^{2+}$ -independent tension). In this experiment, the skinned preparation was first bathed in the relaxing solution, and the MgATP concentration was gradually decreased to induce tension.<sup>28,29</sup> The control pMgATP-tension relation was first obtained in the absence of bupivacaine. Then, the pMgATP-tension relation was measured in the presence of 10 and 100  $\mu\text{M}$  bupivacaine. As was done for the measurement of  $\text{Ca}^{2+}$ -activated

tension, SL was adjusted to 1.9  $\mu\text{m}$  in the relaxing solution before inducing tension. The pMgATP-tension relation was fitted to the Hill equation using the values of  $n_H$  and the midpoint of the relation ( $\text{pMgATP}_{50}$ ).

For the estimation of tension per cross-sectional area, the diameter of muscle was measured in the relaxed condition using a microscope (SMZ645; Nikon) at a magnification of  $225\times$ .<sup>25</sup>

All experiments using skinned ventricular trabeculae were performed at  $20.0 \pm 0.2^\circ\text{C}$ .<sup>25-27</sup>

### Statistical Analysis

The effects of bupivacaine were assessed using one-way analysis of variance with repeated measures and the Scheffé *post hoc* test. Comparisons between control values obtained at the beginning and the end of the studies with skinned preparations were made using Student *t* test for paired data. Statistical significance was verified at  $P < 0.05$  in all cases. Correlation between  $\text{pCa}_{50}$  and maximal tension was evaluated by testing the correlation of these parameters.<sup>27</sup> All data are expressed as mean  $\pm$  SEM, with n representing the number of muscles.

## Results

### Effect of Bupivacaine on Myofibrillar $\text{Ca}^{2+}$ Sensitivity in Isolated Intact Cardiomyocytes

First, we confirmed that bupivacaine at the concentrations of 1 and 3  $\mu\text{M}$  did not affect the fluorescence signals of fura-2 in the presence of various concentrations of free  $\text{Ca}^{2+}$  (pCa from > 9 to 4.3) without myocytes. The baseline values for  $[\text{Ca}^{2+}]_i$  (i.e., during diastole) were not significantly different between groups ( $P > 0.05$ ;  $n = 5$ ), i.e.,  $58.68 \pm 5.31$ ,  $57.56 \pm 14.21$ , and  $84.64 \pm 19.41 \text{ nM}$ , respectively, in the absence and presence of 1 and 3  $\mu\text{M}$  bupivacaine. Likewise, the diastolic cell length was not significantly affected by bupivacaine in that the values were  $135.57 \pm 4.51$ ,  $135.48 \pm 4.89$ , and  $135.27 \pm 5.03 \mu\text{m}$  in the absence and presence of 1 and 3  $\mu\text{M}$  bupivacaine ( $P > 0.05$ ;  $n = 5$ ), respectively.

Figures 1A and B show typical recordings for the time course of changes in  $[\text{Ca}^{2+}]_i$  and cell shortening, respectively, during tetanus obtained during the control condition in the absence of bupivacaine, compared with those in the presence of 1 and 3  $\mu\text{M}$  bupivacaine. It was found that bupivacaine suppressed an increase in  $[\text{Ca}^{2+}]_i$  and subsequent cell shortening, with the magnitude being greater for cell shortening (figs. 1A and B). Figure 1C shows an instantaneous plot of  $[\text{Ca}^{2+}]_i$  versus cell shortening (i.e., Ca-L trajectory) taken from the data of figures 1A and B. Consistent with our previous report,<sup>20</sup> during the control condition, the Ca-L trajectory followed nearly the same path during shortening and relengthening. It is clearly seen that the Ca-L trajectory is shifted to the right (i.e., higher  $[\text{Ca}^{2+}]_i$  side) and maximal cell shortening



Fig. 1. Typical chart recordings for changes in intracellular  $\text{Ca}^{2+}$  concentration ( $[\text{Ca}^{2+}]_i$ ) (A) and percent cell shortening (B) during tetanus in isolated rat ventricular myocytes in the absence and presence of 1 and 3  $\mu\text{M}$  bupivacaine. Control = in the absence of bupivacaine. Myocytes were tetanized for 10 s after treatment with thapsigargin (indicated by "Stimulation"). The same myocyte was used to test the effect of bupivacaine. Data of four signals were averaged. (C) An instantaneous plot of  $[\text{Ca}^{2+}]_i$  versus cell shortening (i.e., Ca-L trajectory). Data were taken from (A) and (B). Dotted line shows 5% cell shortening.

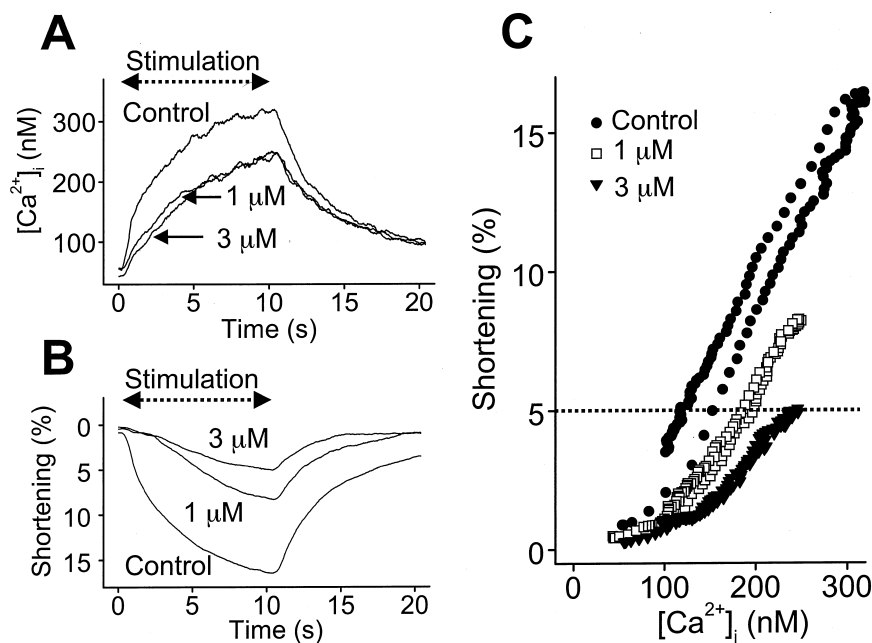

(reached during the 10-s tetanus) is depressed with the addition of bupivacaine. The former is opposite to the effect of EMD 57033, a  $\text{Ca}^{2+}$  sensitizer, and shows a decrease in  $\text{Ca}^{2+}$  sensitivity of myofilaments.<sup>20</sup> The effect of bupivacaine on myofibrillar  $\text{Ca}^{2+}$  sensitivity was quantitatively assessed by  $[\text{Ca}^{2+}]_i$  required for 5% cell shortening (i.e., Ca5%; dotted line in fig. 1C).<sup>20</sup> Bupivacaine increased Ca5% with a statistically significant effect at 3  $\mu\text{M}$  (fig. 2).

#### Effect of Bupivacaine on $\text{Ca}^{2+}$ -activated Isometric Tension in Skinned Ventricular Muscle

Figure 3 shows the effect of bupivacaine on maximal  $\text{Ca}^{2+}$ -activated tension obtained at pCa 4.8 in skinned

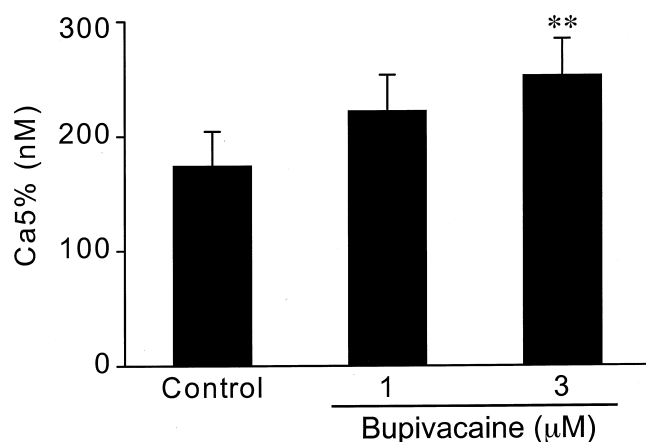

Fig. 2. Effect of bupivacaine on intracellular  $\text{Ca}^{2+}$  concentration ( $[\text{Ca}^{2+}]_i$ ) required for 5% cell shortening (Ca5%). Control = in the absence of bupivacaine. The values were significantly different as follows: 3  $\mu\text{M}$  versus control ( $P < 0.01$ ), 3  $\mu\text{M}$  versus 1  $\mu\text{M}$  ( $P < 0.05$ ). Asterisks indicate the significant difference compared with control for 3  $\mu\text{M}$  ( $P < 0.01$ ). Vertical bars are SEM of five data points.

ventricular trabeculae. During the control condition in the absence of bupivacaine, maximal tension was  $46.34 \pm 2.96 \text{ kN/m}^2$ , similar to what was obtained in our previous studies.<sup>25-27</sup> Bupivacaine was found to significantly decrease maximal tension at 10 and 100  $\mu\text{M}$ .

Figure 4 shows typical chart recordings for changes in isometric tension obtained by varying the free  $\text{Ca}^{2+}$  concentration (pCa from  $> 9$  to 4.8) in the absence and presence of bupivacaine (100  $\mu\text{M}$ ). In the absence of bupivacaine, the pCa-tension relation ( $\text{pCa}_{50}$  and  $n_H$ )

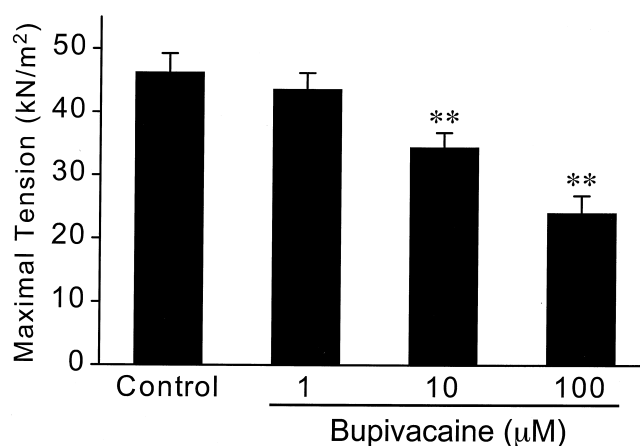

Fig. 3. Effect of bupivacaine on maximal  $\text{Ca}^{2+}$ -activated tension in skinned ventricular trabeculae obtained at pCa 4.8. The concentration of bupivacaine was changed from 1 to 100  $\mu\text{M}$ . Control = in the absence of bupivacaine. The values were significantly different as follows ( $P < 0.01$  for all): 10  $\mu\text{M}$  versus control, 10  $\mu\text{M}$  versus 1  $\mu\text{M}$ , 100  $\mu\text{M}$  versus control, 100  $\mu\text{M}$  versus 1  $\mu\text{M}$ , and 100  $\mu\text{M}$  versus 10  $\mu\text{M}$ . Asterisks indicate the significant difference compared with control ( $P < 0.01$ ). Tension at pCa 4.8 was regarded as the maximum because a further increase in the  $\text{Ca}^{2+}$  concentration had no effect on isometric tension in the presence of 100  $\mu\text{M}$  bupivacaine. Vertical bars are SEM of eight data points.

## Control

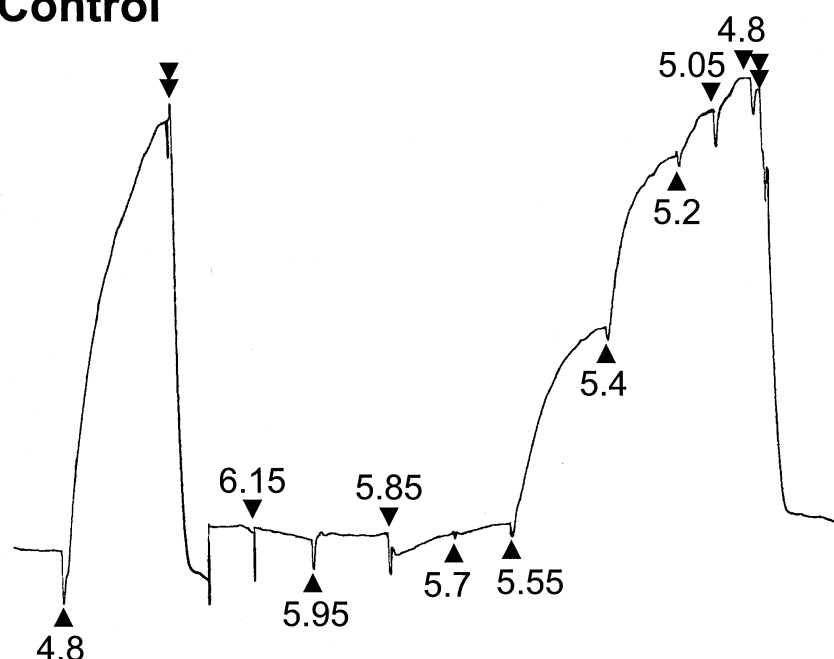

## + Bupivacaine

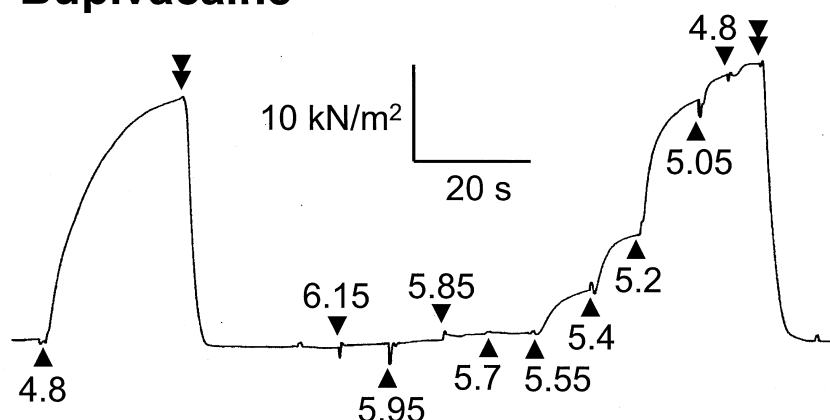

Fig. 4. Typical chart recordings for measurement of isometric tension with increasing the concentration of free  $\text{Ca}^{2+}$  in the absence (control) and presence of  $100 \mu\text{M}$  bupivacaine in skinned ventricular trabeculae. pCa was varied from greater than 9 (relaxed condition) to 4.8 in a stepwise manner. Note that the final tension at pCa 4.8 is similar to that obtained before varying pCa in the absence and presence of bupivacaine, showing reproducibility of tension development. Arrowheads indicate the points at which muscle was transferred to the solution containing a higher concentration of free  $\text{Ca}^{2+}$ , as indicated. Double arrowheads indicate the points at which muscle was transferred to the relaxing solution. Data taken from the same preparation.

and maximal tension were not significantly altered on repeated activations (experiment repeated four times; N. Fukuda, Ph.D., unpublished data, September 16, 1999). In the presence of bupivacaine, maximal tension (pCa 4.8) was lower and its inhibitory effect was more pronounced during submaximal activation (pCa 5.55 and 5.4). Figure 5A shows the pCa-tension relations (of which the ordinate is expressed in absolute values of active tension,  $\text{kN/m}^2$ ) in the absence and presence of 10 and  $100 \mu\text{M}$  bupivacaine. It is clearly seen that bupivacaine significantly suppresses  $\text{Ca}^{2+}$ -activated tension over the range of pCa used (*i.e.*, from 5.7 to 4.8). Absolute values of tension at various pCa values were converted to relative values (*i.e.*, relative to the maximum at pCa 4.8) to obtain the normalized pCa-tension relations (fig. 5B). We found that the pCa-tension relation was significantly shifted to the right (*i.e.*, the lower pCa

[higher free  $\text{Ca}^{2+}$  concentration] side) with 10 and  $100 \mu\text{M}$  bupivacaine, showing a decrease in myofibrillar  $\text{Ca}^{2+}$  sensitivity (table 1). The Hill coefficient ( $n_H$ ) values for the pCa-tension relations are summarized in table 1. Bupivacaine showed a tendency to decrease  $n_H$ , but not significantly.

It was found that a highly correlated linear relation ( $R = 0.81$ ,  $P < 0.0005$ ) was present between  $\text{pCa}_{50}$  and maximal  $\text{Ca}^{2+}$ -activated tension in preparations used for the measurement of the pCa-tension relations (fig. 5C).

After using bupivacaine (up to  $100 \mu\text{M}$ ), we measured maximal tension (fig. 3) or the pCa-tension relation (fig. 5) in the absence of bupivacaine. Skinned preparations were immersed in the relaxing solution to wash out bupivacaine for 20 min. The observed value for maximal tension was  $44.89 \pm 3.02 \text{ kN/m}^2$  which was comparable to that obtained in the beginning of the experiment

( $P > 0.05$  compared with the control value in fig. 3; *i.e.*,  $46.34 \pm 2.96 \text{ kN/m}^2$ ). The value of  $\text{pCa}_{50}$  was  $5.47 \pm 0.02$  and that of  $n_H$  was  $5.10 \pm 0.49$  ( $P > 0.05$  for each parameter compared with a corresponding control value in table 1). These results suggest that the inhibitory effect of bupivacaine on contractile proteins is revers-

**Table 1. Summary of  $\text{pCa}_{50}$  and  $n_H$  Values for pCa-Tension Relation in Figure 5**

|                   | $\text{pCa}_{50}$ | $n_H$           |
|-------------------|-------------------|-----------------|
| Control           | $5.49 \pm 0.02$   | $5.05 \pm 0.43$ |
| Bupivacaine       |                   |                 |
| 10 $\mu\text{M}$  | $5.42 \pm 0.01$   | $4.82 \pm 0.61$ |
| 100 $\mu\text{M}$ | $5.36 \pm 0.02$   | $4.60 \pm 0.48$ |

The  $\text{pCa}_{50}$  values were significantly different between groups as follows ( $n = 5$ ): 10  $\mu\text{M}$  versus control ( $P < 0.05$ ), 100  $\mu\text{M}$  versus control ( $P < 0.01$ ), 100  $\mu\text{M}$  versus 10  $\mu\text{M}$  ( $P < 0.05$ ). The  $n_H$  values were not significantly different between groups ( $P > 0.05$ ).

$\text{pCa}_{50} = -\log [\text{Ca}^{2+}]$  at  $P = 50\%$ ;  $n_H$  = Hill coefficient.

ible, in contrast to its blocking effect on sodium channels.<sup>8</sup>

#### *Effect of Bupivacaine on Tension Induced by Rigor Cross-bridges in the Absence of $\text{Ca}^{2+}$*

Figure 6 shows typical changes in tension induced by lowering the MgATP concentration in the absence and presence of 100  $\mu\text{M}$  bupivacaine. During the control condition in the absence of bupivacaine, tension started to develop by lowering the MgATP concentration to 5.25, reached a plateau at pMgATP 5.55, then gradually declined with a further decrease in the MgATP concentration.<sup>28,29</sup> In the same preparation, the shape of the relation between pMgATP and tension (*i.e.*, the pMgATP-tension relation) did not change in the second series of tension measurement. We found that in the presence of bupivacaine, maximal tension was lower and its inhibitory effect was substantially more pronounced during submaximal activation (see pMgATP 5.25 in fig. 6). Figure 7 shows the effect of 10 and 100  $\mu\text{M}$  bupivacaine on the pMgATP-tension relation normalized to maximal tension. The midpoint of the pMgATP-tension relation ( $\text{pMgATP}_{50}$ ) was similar to what was previously reported using rat ventricular muscle (table 2).<sup>28</sup> It was found that bupivacaine significantly shifted the curve to the left, *i.e.*, to the lower MgATP concentration side, and slightly decreased the  $n_H$  value ( $P > 0.05$ ; table 2). As found for  $\text{Ca}^{2+}$ -activated tension (figs. 3 and 5A), bupivacaine significantly decreased  $\text{Ca}^{2+}$ -independent tension at maximal activation (fig. 7).

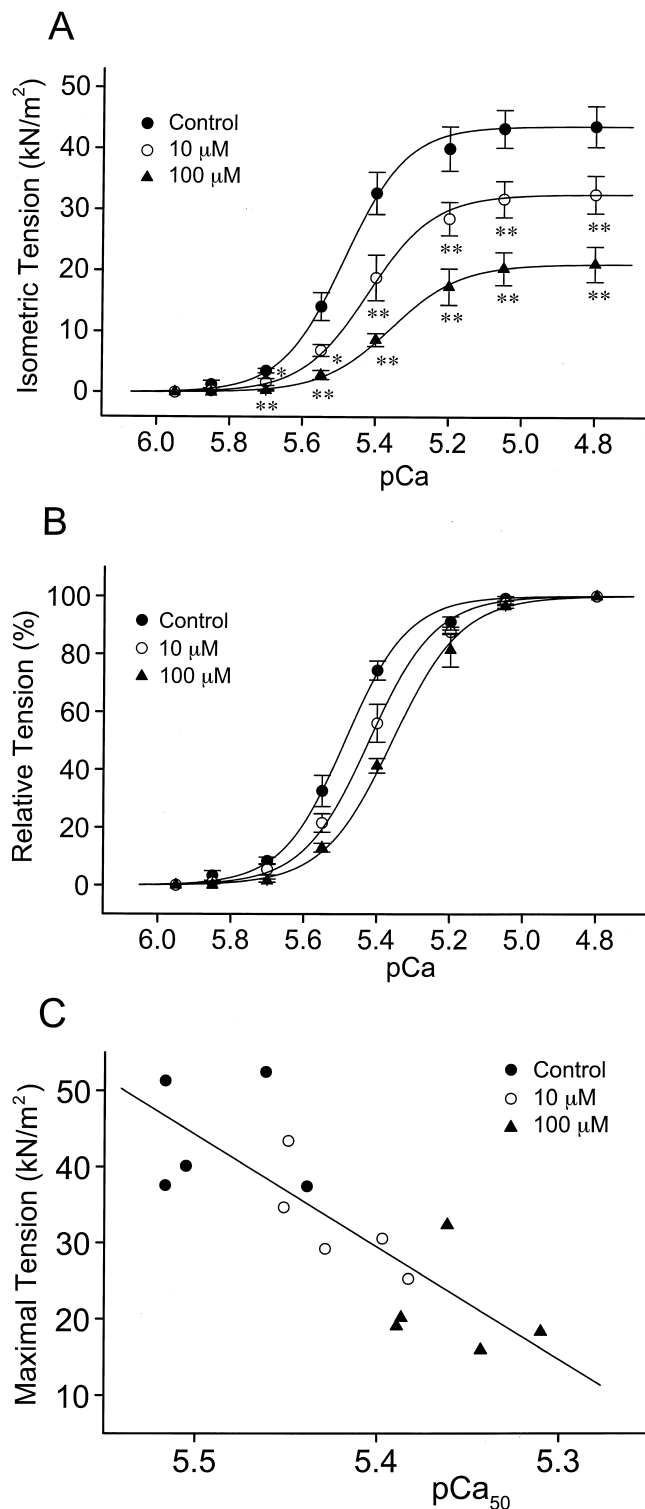

**Fig. 5. Effect of bupivacaine (10 and 100  $\mu\text{M}$ ) on  $\text{Ca}^{2+}$ -activated tension in skinned ventricular trabeculae. (A) pCa-tension relations in the absence and presence of bupivacaine. Results are shown in absolute values of tension. Control = in the absence of bupivacaine. Asterisks indicate significant differences compared with control for 10 and 100  $\mu\text{M}$  bupivacaine (\* $P < 0.05$ ; \*\* $P < 0.01$ ). (B) Same as in (A) but tension was normalized with respect to that at pCa 4.8 for all curves. Data obtained for each preparation were fitted to the Hill equation with the mean values of  $\text{pCa}_{50}$  and  $n_H$  [isometric tension obtained at pCa 4.8 was regarded as the maximum for each curve in (A)]. Vertical bars are SEM of five data points. (C) The linear regression line between the midpoint of the pCa-tension relation ( $\text{pCa}_{50}$ ) and maximal  $\text{Ca}^{2+}$ -activated tension at pCa 4.8 (data were taken from the same preparations used for measurement of the pCa-tension relations). A high correlation ( $R = 0.81$ ;  $P < 0.0005$ ) was obtained.**

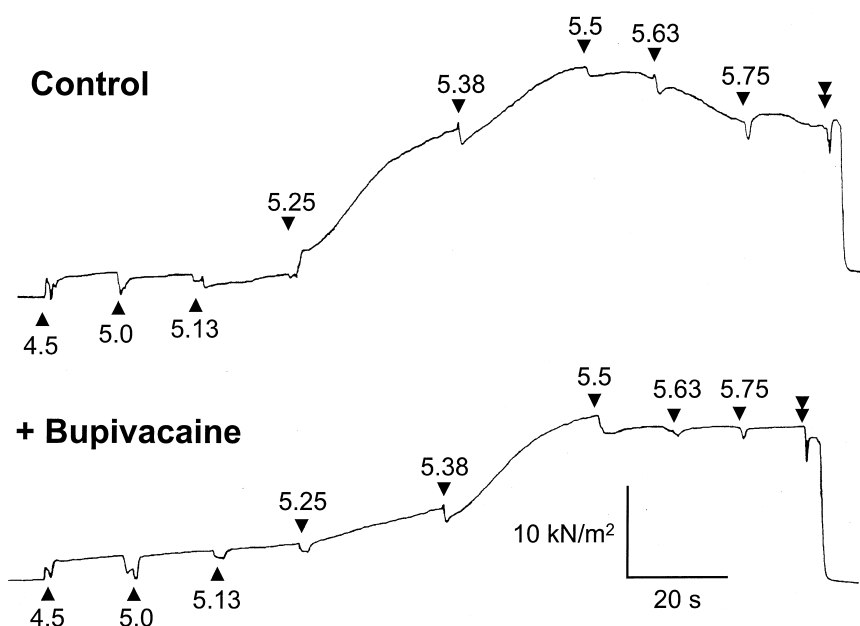

Fig. 6. Typical chart recordings for the measurement of isometric tension induced by rigor cross-bridges in the absence (control) and presence of 100  $\mu$ M bupivacaine in skinned ventricular trabeculae.  $\text{Ca}^{2+}$  was absent. Tension was induced by gradually reducing the Mg-adenosine triphosphate (MgATP) concentration. Arrowheads indicate the points at which muscle was transferred to the solution containing a lower concentration of MgATP, as indicated. Double arrowheads indicate the points at which muscle was transferred to the relaxing solution. The same preparation was used.

We confirmed that  $\text{pMgATP}_{50}$  and maximal tension were not significantly affected by increasing the creatine phosphokinase concentration from 15 to 150 U/ml. This indicates that 15 U/ml creatine phosphokinase was sufficient to remove adenosine diphosphate in the myofilament lattice, and thus the effect of adenosine diphosphate on cross-bridges<sup>30,31</sup> could be disregarded in our experimental conditions.

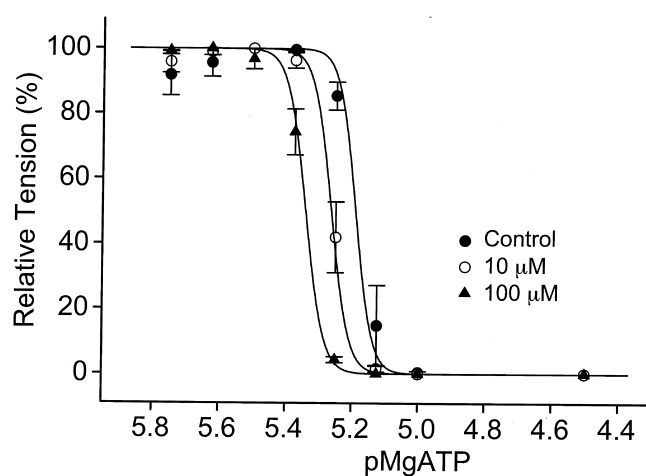

Fig. 7. Effect of bupivacaine (10 and 100  $\mu$ M) on  $\text{Ca}^{2+}$ -independent active tension. Results are shown in pMg-adenosine triphosphate (pMgATP)–tension relations. Tension was normalized with respect to maximal tension at pMgATP 5.5, 5.5, and 5.63, respectively, in the absence (control) and presence of 10 and 100  $\mu$ M bupivacaine. Data obtained for each preparation was fitted to the Hill equation with the mean values of  $\text{pMgATP}_{50}$  and  $n_H$ . Absolute values of maximal tension were  $25.24 \pm 3.61$ ,  $20.56 \pm 3.37$ , and  $15.09 \pm 2.89$  kN/m<sup>2</sup>, respectively, in the absence (control) and presence of 10 and 100  $\mu$ M bupivacaine, and the values were significantly different as follows: 10  $\mu$ M versus control ( $P < 0.05$ ), 100  $\mu$ M versus control ( $P < 0.01$ ), and 100  $\mu$ M versus 10  $\mu$ M ( $P < 0.05$ ). Data obtained for each preparation were fitted to the Hill equation with the mean values of  $\text{pMgATP}_{50}$  and  $n_H$ . Vertical bars are SEM of five data points.

## Discussion

The findings of the current study are threefold. First, bupivacaine decreased  $\text{Ca}^{2+}$  sensitivity of myofilaments in isolated intact ventricular myocytes. Second, bupivacaine decreased myofibrillar  $\text{Ca}^{2+}$  sensitivity, as well as maximal  $\text{Ca}^{2+}$ -activated tension, in skinned ventricular trabeculae. Third, bupivacaine suppressed tension induced by lowering the MgATP concentration in the absence of  $\text{Ca}^{2+}$  in skinned ventricular trabeculae.

In the current study, we induced tetanic contractions in thapsigargin-treated isolated cardiomyocytes and confirmed the result of our previous study,<sup>20</sup> that the loop of the Ca-L trajectory is very narrow (fig. 1C) as compared with the phase-plane loop of twitch contraction.<sup>32</sup> This suggests that the dynamic equilibrium between  $[\text{Ca}^{2+}]_i$  and cell length is achieved during shortening and re-lengthening, presumably owing to slow changes in  $[\text{Ca}^{2+}]_i$  during tetanus.<sup>20</sup> It is therefore considered that the Ca-L trajectory used in this study is suitable to examine the effects of various compounds on steady state  $\text{Ca}^{2+}$  sensitivity of myofilaments in intact myocytes. Our data showed that bupivacaine suppressed the increase of

Table 2. Summary of  $\text{pMgATP}_{50}$  and  $n_H$  Values for pMgATP–Tension Relation in Figure 7

|             | $\text{pMgATP}_{50}$ | $n_H$            |
|-------------|----------------------|------------------|
| Control     | $5.19 \pm 0.02$      | $17.93 \pm 1.49$ |
| Bupivacaine |                      |                  |
| 10 $\mu$ M  | $5.26 \pm 0.02$      | $16.80 \pm 2.04$ |
| 100 $\mu$ M | $5.34 \pm 0.01$      | $16.20 \pm 1.98$ |

The pMgATP values were significantly different between groups as follows ( $n = 5$ ): 10  $\mu$ M versus control ( $P < 0.05$ ), 100  $\mu$ M versus control ( $P < 0.01$ ), 100  $\mu$ M versus 10  $\mu$ M ( $P < 0.05$ ). The  $n_H$  values were not significantly changed ( $P > 0.05$ ).

pMgATP =  $-\log$  magnesium-adenosine triphosphate;  $n_H$  = Hill coefficient.



$[\text{Ca}^{2+}]_i$  and subsequent cell shortening (figs. 1A and B), and its effect was greater on shortening, as judged by the rightward shift of the Ca-L trajectory (fig. 1C; see also Fig. 2 for quantitative analysis). Previous reports suggest that the acute inhibitory effect of bupivacaine on systolic  $[\text{Ca}^{2+}]_i$  is primarily attributable to its blocking effect on sarcolemmal  $\text{Na}^+$  and  $\text{Ca}^{2+}$  channels and also to its inhibitory effect on the sarcoplasmic reticulum function.<sup>8-10,12,13</sup> In our experimental condition where tetanus was induced, however, the observed decrease in systolic  $[\text{Ca}^{2+}]_i$  (fig. 1A) likely arose in large part from the blocking effect of bupivacaine on sarcolemmal  $\text{Ca}^{2+}$  channels. On the other hand, the rightward shift of the Ca-L trajectory (especially a significant increase in the Ca5% value at 3  $\mu\text{M}$ ; fig. 2) shows that bupivacaine decreased myofibrillar  $\text{Ca}^{2+}$  sensitivity in intact cardiac muscle. We therefore consider that bupivacaine exerts a negative inotropic effect *via*, at least in part, inhibition of the pathway beyond intracellular  $\text{Ca}^{2+}$  mobilization by the membrane system.

Our results with skinned cardiac muscle showed that bupivacaine shifted the pCa-tension relation to the right and concomitantly decreased maximal  $\text{Ca}^{2+}$ -activated tension at the concentrations of 10  $\mu\text{M}$  and higher (figs. 3 and 5A and B; table 1). Herzig *et al.*<sup>3</sup> reported that 10  $\mu\text{M}$  bupivacaine decreased twitch tension by approximately 20% in guinea pig cardiac muscle. The experimental condition of this earlier study is different from ours, where atrial, but not ventricular, muscle of different animal species was used; therefore, care should be taken in interpreting the experimental data. Nevertheless, it is safe to consider that, looking at the data for 10  $\mu\text{M}$  bupivacaine in figures 3, 5A, and 7, the result of the current study is in reasonable agreement with that of Herzig *et al.*<sup>3</sup> In a different series of experiments, we confirmed that 10  $\mu\text{M}$  bupivacaine depressed peak twitch tension by approximately 25% and abbreviated time required for relaxation from peak tension to 50% tension by approximately 10% in isometrically contracting ventricular papillary muscle of the rat (unpublished data, July 15, 2000, Yasushi Mio, M.D., Tokyo, Japan).

One straightforward interpretation for the decrease in  $\text{Ca}^{2+}$  sensitivity is that bupivacaine somehow inhibits the binding of  $\text{Ca}^{2+}$  to troponin C (TnC) by directly acting on TnC (or other subunits of the troponin molecule, *i.e.*, troponin I and troponin T) and, consequently, decreases isometric tension during submaximal activation. However, it should be emphasized that bupivacaine suppressed not only  $\text{Ca}^{2+}$  sensitivity, but also maximal  $\text{Ca}^{2+}$ -activated tension (figs. 3, 4, and 5A), and its inhibitory effect on  $\text{Ca}^{2+}$  sensitivity and that on maximal tension were closely correlated (fig. 5C). This is consistent with the result of the experiment with intact myocytes in that bupivacaine also depressed maximal cell shortening (reached during the 10-s tetanus; fig. 1C). These results favor the interpretation that a direct inter-

action of bupivacaine at a locus beyond  $\text{Ca}^{2+}$  binding to TnC, possibly the interaction of myosin molecules with actin, underlies the observed negative inotropic effect of this compound at the myofilament level.

It is well established that decreasing the MgATP concentration in the absence of  $\text{Ca}^{2+}$  promotes the formation of rigor cross-bridges, which suppresses the inhibition of the regulatory proteins troponin and tropomyosin on thin filaments just as if  $\text{Ca}^{2+}$  were bound to TnC.<sup>33</sup> It has been reported that these rigor cross-bridges, formed on decrease in the MgATP concentration, enhance the formation of the "on" state of thin filaments, which subsequently accelerates the attachment of neighboring myosins to thin filaments and therefore induces tension.<sup>29</sup> A further decrease in the MgATP concentration resulted in a decrease in tension (figs. 6 and 7), presumably because the number of actively cycling (force-generating) cross-bridges is decreased. Here, tension is a function of the number of force-generating and rigor cross-bridges as well as the relative activation of thin filaments.<sup>34</sup> In the current study, bupivacaine substantially shifted the pMgATP-tension relation to the higher pMgATP (*i.e.*, lower MgATP concentration) side and also decreased maximally activated tension (figs. 6 and 7; table 2). These results appear to provide further evidence that bupivacaine can suppress the pathway downstream from  $\text{Ca}^{2+}$  binding to TnC, possibly the actomyosin interaction *per se*. Therefore, based on the result of  $\text{Ca}^{2+}$ -independent activation (figs. 6 and 7), as well as that of maximal  $\text{Ca}^{2+}$ -activated tension (figs. 3, 4, and 5A), we propose that bupivacaine can directly act on the actomyosin interaction, thereby either decreasing the number of force-generating cross-bridges or reducing the force per force-generating cross-bridge, or both, which results in a decrease in apparent  $\text{Ca}^{2+}$  sensitivity of myofilaments.

Boban *et al.*<sup>2</sup> reported that bupivacaine at the concentrations of 3–5  $\mu\text{M}$  reduced ventricular systolic pressure by 20–30% in isolated guinea pig hearts. Considering a similar concentration range used therein, our proposed mechanism, albeit the possible species difference (rats *vs.* guinea pigs), may in part underlie the cardiodepressant effect of bupivacaine demonstrated in isolated whole hearts.<sup>2</sup>

It is widely accepted that  $n_H$  of the pCa-tension relation and that of the pMgATP-tension relation reflect the cooperative activation of thin filaments.<sup>28,29,31,35</sup> Bupivacaine showed a tendency to slightly reduce cooperativity both in  $\text{Ca}^{2+}$ -dependent (table 1) and  $\text{Ca}^{2+}$ -independent activation (table 2). Here, it is unlikely that bupivacaine directly affects cooperative activation of thin filaments by specifically acting on thin filament proteins (*i.e.*, troponin, tropomyosin, or actin) as the magnitude of the reduction of cooperativity was very small (approximately 10%) and the effect was statistically not significant ( $P > 0.05$ ) both in  $\text{Ca}^{2+}$ -dependent and



-independent activation (see 100  $\mu\text{M}$  in tables 1 and 2). It is well established that strongly binding cross-bridges such as force-generating and rigor cross-bridges enhance the cooperative activation of thin filaments.<sup>25,31,36</sup> We therefore consider that the tendency of reduced cooperativity observed in the presence of bupivacaine is coupled with a decrease in the number of strongly binding cross-bridges or a reduction of the force per strongly binding cross-bridge, or both, rather than its direct effect on thin filament proteins.

We noted a difference regarding the  $\text{Ca}^{2+}$ -desensitizing effect of bupivacaine in isolated intact cardiomyocytes and in skinned trabeculae. In intact cells, 1 and 3  $\mu\text{M}$  bupivacaine altered the shape and position of the Ca-L trajectory (with statistically significant effect at 3  $\mu\text{M}$ ; figs. 1C and 2), whereas 10  $\mu\text{M}$  or higher was necessary to lower isometric tension in skinned preparations (figs. 3 and 5A; table 1). The following two hypotheses could be raised regarding the greater effect of bupivacaine in intact cells. First, during shortening of tetanized cells, SL continues to decrease from the resting value (*i.e.*, approximately 1.8  $\mu\text{m}$ ) until stimulation is terminated. On the other hand, changes in SL (adjusted to 1.9  $\mu\text{m}$  in the relaxed condition) are reportedly minimal during isometric contraction in rat skinned ventricular trabeculae.<sup>27,37</sup> It is known that a decrease in SL from approximately 1.8  $\mu\text{m}$  results in an increased double-overlap region of the thick and thin filaments<sup>38</sup> as well as widening of the lateral separation of these filaments,<sup>39</sup> both of which probably reduce the likelihood of myosin attaching to the thin filament. Therefore, provided that bupivacaine directly acts on the actomyosin interaction as discussed above, its effect is more pronounced during cell shortening, where cross-bridge formation is relatively retarded because of progressive SL shortening, compared with during isometric contraction (see Fukuda *et al.*<sup>26</sup> for a similar SL-dependent effect of hydrogen ion or inorganic phosphate). Second, in intact preparations, bupivacaine may influence the intracellular signal transduction pathway, such as by deactivating myosin light chain kinase<sup>40</sup> or protein kinase C<sup>41</sup> (resulting in dephosphorylation of myosin light chain 2, *i.e.*, decreased  $\text{Ca}^{2+}$  sensitivity<sup>42</sup>), or change the intracellular milieu, such as by lowering the intracellular pH, and subsequently enhance its negative inotropic effect. Here it should be emphasized that the protein kinase A-dependent phosphorylation of troponin I (resulting in a decrease in  $\text{Ca}^{2+}$  sensitivity<sup>43</sup>) is not likely involved in the  $\text{Ca}^{2+}$ -desensitizing effect of bupivacaine as this compound is known to inhibit the production of cyclic-3',5'-adenosine monophosphate.<sup>44</sup>

The literature indicates that, in humans, the plasma concentration of bupivacaine is in the range of 1–3  $\mu\text{g}/\text{ml}$  (approximately 3–10  $\mu\text{M}$ ) with typical clinical doses.<sup>45,46</sup> It is well known that an accidental rapid intravenous injection of bupivacaine can lead to cardiac arrest. In a recent

study, Chang *et al.*<sup>6</sup> reported that an intracoronary administration of bupivacaine induced ventricular fibrillation in conscious sheep (4 of 6 animals). The authors also noted that, in the surviving animals, bupivacaine produced a decrease in myocardial contractility (as indexed by  $\text{dP}/\text{dt}_{\text{max}}$ ), tachycardia (probably due to baroreceptor reflex activation), and widening of electrocardiographic QRS complexes. It is likely that the well-documented arrhythmogenic effects of bupivacaine<sup>4–6</sup> are due to reentrant phenomena caused by drug-induced conduction disorders.<sup>5</sup> On the other hand, our results clearly show that bupivacaine at micromolar concentrations to 10  $\mu\text{M}$  decreases  $\text{Ca}^{2+}$  sensitivity in isotonicity (figs. 1 and 2) as well as in isometrically (figs. 3, 5, and 7; tables 1 and 2) contracting ventricular preparations. Reportedly, in rats, cardiac arrest is induced by an intravenous infusion of bupivacaine at the plasma concentration of approximately 300  $\mu\text{M}$ .<sup>47</sup> The possible species difference (rats *vs.* humans) should be taken into account in interpreting the current data; however, our results suggest that clinically relevant doses of bupivacaine may suppress the contractility of cardiac muscle at the myofilament level *in vivo*. It is therefore reasonable to conclude that clinically relevant doses of bupivacaine may reduce cardiac contractility and that an accidental rapid intravenous injection of this compound may lead to cardiac arrest at the myofilament level in humans.

In several aspects, however, the conditions of our experiments were obviously different from those encountered in humans, and care should be taken in the interpretation of the experimental data. One of the important variables may be the temperature, since some volatile anesthetics (*i.e.*, halothane, isoflurane, and enflurane)<sup>48</sup> and lidocaine–lignocaine<sup>49</sup> reportedly show temperature-dependent differences in their negative inotropic effects. We performed all experiments at 20–22°C to match the experimental conditions to those established in our previous studies.<sup>20,25–27</sup> The negative inotropic effect of bupivacaine may depend on temperature, and thus future studies are needed to clarify the temperature dependence of its action in an experimental system (such as in isometrically contracting ventricular papillary muscle) that allows us to use a physiologically more relevant temperature.

In the current study, we demonstrated that bupivacaine decreased  $\text{Ca}^{2+}$  sensitivity of myofilaments in intact and skinned ventricular muscle of the rat. In skinned muscle preparations, bupivacaine suppressed  $\text{Ca}^{2+}$ -independent tension as well as maximal  $\text{Ca}^{2+}$ -activated tension, suggesting that it directly inhibits the actomyosin interaction, and myofibrillar  $\text{Ca}^{2+}$  sensitivity is thereby apparently decreased. This effect may in part give rise to the overall cardiodepressant action of bupivacaine *in vivo*.

The authors thank Shin'ichi Ishiwata, Ph.D. (Professor, Department of Physics, Waseda University, Tokyo, Japan), Masato Konishi, M.D., Ph.D. (Professor, De-

partment of Physiology, Tokyo Medical University, Tokyo, Japan), and Henk Granzier, Ph.D. (Professor, Department of VCAPP, Washington State University, Pullman, Washington), for critical reading of the manuscript; Yoshiaki Amaki, M.D. (Professor, Department of Anesthesiology, The Jikei University School of Medicine, Tokyo, Japan), for continuous encouragement; and Naoko Tomizawa (Technician, Department of Physiology [III], The Jikei University School of Medicine, Tokyo, Japan) for superb technical assistance.

## References

1. Tanz RD, Heskett T, Loehning RW, Fairfax CA: Comparative cardiotoxicity of bupivacaine and lidocaine in the isolated perfused mammalian heart. *Anesth Analg* 1984; 63:549-56
2. Boban M, Stowe DF, Gross GJ, Pieper GM, Kampine JP, Bosnjak ZJ: Potassium channel openers attenuate atrioventricular block by bupivacaine in isolated hearts. *Anesth Analg* 1993; 76:1259-65
3. Herzog S, Ruhnke L, Wulf H: Functional interaction between local anaesthetics and calcium antagonists in guinea pig myocardium: 1. Cardiodepressant effects in isolated organs. *Br J Anaesth* 1994; 73:357-63
4. Wheeler DM, Bradley EL, Woods WT Jr: The electrophysiologic actions of lidocaine and bupivacaine in the isolated, perfused canine heart. *ANESTHESIOLOGY* 1988; 68:201-12
5. de la Coussaye JE, Brugada J, Alessie MA: Electrophysiologic and arrhythmogenic effects of bupivacaine: A study with high-resolution ventricular epicardial mapping in rabbit hearts. *ANESTHESIOLOGY* 1992; 77:132-41
6. Chang DH, Ladd LA, Copeland S, Iglesias MA, Plummer JL, Mather LE: Direct cardiac effects of intracoronary bupivacaine, levobupivacaine and ropivacaine in the sheep. *Br J Pharmacol* 2001; 132:649-58
7. Albright GA: Cardiac arrest following regional anesthesia with etidocaine or bupivacaine. *ANESTHESIOLOGY* 1979; 51:285-7
8. Clarkson CW, Hondeghem LM: Mechanism for bupivacaine depression of cardiac conduction: Fast block of sodium channels during the action potential with slow recovery from block during diastole. *ANESTHESIOLOGY* 1985; 62:396-405
9. Wulf H, Gödicke J, Herzog S: Functional interaction between local anaesthetics and calcium antagonists in guinea pig myocardium: 2. Electrophysiological studies with bupivacaine and nifedipine. *Br J Anaesth* 1994; 73:364-70
10. Rossner KL, Freese KJ: Bupivacaine inhibition of L-type calcium current in ventricular cardiomyocytes of hamster. *ANESTHESIOLOGY* 1997; 87:926-34
11. Castle NA: Bupivacaine inhibits the transient outward  $\text{K}^+$  current but not the inward rectifier in rat ventricular myocytes. *J Pharmacol Exp Ther* 1990; 255:1038-46
12. Lynch C III: Depression of myocardial contractility in vitro by bupivacaine, etidocaine, and lidocaine. *Anesth Analg* 1986; 65:551-9
13. Komai H, Lokuta AJ: Interaction of bupivacaine and tetracaine with the sarcoplasmic reticulum  $\text{Ca}^{2+}$  release channel of skeletal and cardiac muscles. *ANESTHESIOLOGY* 1999; 90:835-43
14. Weinberg GL, Palmer JW, VadeBoncouer TR, Zuechner MB, Edelman G, Hoppel CL: Bupivacaine inhibits acylcarnitine exchange in cardiac mitochondria. *ANESTHESIOLOGY* 2000; 92:523-8
15. Eledjam JJ, de la Coussaye JE, Brugada J, Bassoul B, Gagnon JP, Fabregat JR, Massé C, Sassine A: In vitro study on mechanisms of bupivacaine-induced depression of myocardial contractility. *Anesth Analg* 1986; 69:732-5
16. Tavernier BM, Adnet PJ, Imbenotte M, Etchivri TS, Reyford H, Haudecoeur G, Scherpercel P, Krivosic-Horber RM: Halothane and isoflurane decrease calcium sensitivity and maximal force in human skinned cardiac fibers. *ANESTHESIOLOGY* 1994; 80:625-33
17. Housmans PR, Wanek LA, Carton EG, Bartunek AE: Effects of halothane and isoflurane on the intracellular  $\text{Ca}^{2+}$  transient in ferret cardiac muscle. *ANESTHESIOLOGY* 2000; 93:189-201
18. Kanaya N, Zakhary DR, Murray PA, Damron DS: Differential effects of fentanyl and morphine on intracellular  $\text{Ca}^{2+}$  transients and contraction in rat ventricular myocytes. *ANESTHESIOLOGY* 1998; 89:1532-42
19. Hongo K, Konishi M, Kurihara S: Cytosolic free  $\text{Mg}^{2+}$  in rat ventricular myocytes studied with the fluorescent indicator fura-2. *Jpn J Physiol* 1994; 44:357-78
20. Hongo K, Kusakari Y, Konishi M, Kurihara S, Mochizuki S: Estimation of myofibrillar responsiveness to  $\text{Ca}^{2+}$  in isolated rat ventricular myocytes. *Pflügers Arch* 1998; 436:639-45
21. Grynkiewicz G, Poenie M, Tsien RY: A new generation of  $\text{Ca}^{2+}$  indicators with greatly improved fluorescence properties. *J Biol Chem* 1985; 260:3440-50
22. Berlin JR, Konishi M:  $\text{Ca}^{2+}$  transients in cardiac myocytes measured with high and low affinity  $\text{Ca}^{2+}$  indicators. *Biophys J* 1993; 65:1632-47
23. Bakker AJ, Head SI, Williams DA, Stephenson DG:  $\text{Ca}^{2+}$  levels in myotubes grown from the skeletal muscles of dystrophic (mdx) and normal mice. *J Physiol (Lond)* 1993; 460:1-13
24. Janczewski AM, Lakatta EG: Thapsigargin inhibits  $\text{Ca}^{2+}$  uptake, and  $\text{Ca}^{2+}$  depletes sarcoplasmic reticulum in intact cardiac myocytes. *Am J Physiol* 1993; 265:H517-22
25. Fukuda N, Kajiwarra H, Ishiwata S, Kurihara S: Effects of MgADP on length dependence of tension generation in skinned rat cardiac muscle. *Circ Res* 2000; 86:e1-6
26. Fukuda N, O-Uchi J, Sasaki D, Kajiwarra H, Ishiwata S, Kurihara S: Acidosis or inorganic phosphate enhances the length dependence of tension in rat skinned cardiac muscle. *J Physiol (Lond)* 2001; 536:153-60
27. Fukuda N, Sasaki D, Ishiwata S, Kurihara S: Length dependence of tension generation in rat skinned cardiac muscle: Role of titin in the Frank-Starling mechanism of the heart. *Circulation* 2001; 104:1639-45
28. Metzger JM: Myosin binding-induced cooperative activation of the thin filament in cardiac myocytes and skeletal muscle fibers. *Biophys J* 1995; 68:1430-42
29. Metzger JM: pH dependence of myosin binding-induced activation of the thin filament in cardiac myocytes in skeletal fibers. *Am J Physiol* 1996; 270:H1008-14
30. Cooke R, Pate E: The effects of ADP and phosphate on the contraction of muscle fibers. *Biophys J* 1985; 48:789-98
31. Fukuda N, Fujita H, Fujita T, Ishiwata S: Regulatory roles of MgADP and calcium in tension development of skinned cardiac muscle. *J Muscle Res Cell Motil* 1998; 19:909-21
32. Spurgeon HA, duBell WH, Stern MD, Sollott SJ, Ziman BD, Silverman HS, Capogrossi MC, Talo A, Lakatta EG: Cytosolic calcium and myofilaments in single rat cardiac myocytes achieve a dynamic equilibrium during twitch relaxation. *J Physiol (Lond)* 1992; 447:83-102
33. Bremel RD, Weber A: Cooperation within actin filament in vertebrate skeletal muscle. *Nature (new Biol)* 1972; 238:97-101
34. Palmiter KA, Kitada Y, Muthuchamy M, Wiecek DF, Solaro RJ: Exchange of  $\beta$ - for  $\alpha$ -tropomyosin in hearts of transgenic mice induces changes in thin filament response to  $\text{Ca}^{2+}$ , strong cross-bridge binding, and protein phosphorylation. *J Biol Chem* 1996; 271:11611-4
35. Moss RL: Plasticity in the dynamics of myocardial contraction:  $\text{Ca}^{2+}$ , crossbridge kinetics, or molecular cooperation. *Circ Res* 1999; 84:862-5
36. Fitzsimons DP, Moss RL: Strong binding of myosin modulates length dependent  $\text{Ca}^{2+}$  activation of rat ventricular myocytes. *Circ Res* 1998; 83:602-7
37. Kentish JC, ter Keurs HE, Ricciardi L, Bucx JJ, Noble MI: Comparison between the sarcomere length-force relations of intact and skinned trabeculae from right ventricle. Influence of calcium concentrations on these relations. *Circ Res* 1986; 58:755-68
38. Gordon AM, Huxley AF, Julian FJ: The variation in isometric tension with sarcomere length in vertebrate muscle fibres. *J Physiol (Lond)* 1966; 184:170-92
39. Irving TC, Konhilas J, Perry D, Fischetti R, de Tombe PP: Myofilament lattice spacing as a function of sarcomere length in isolated rat myocardium. *Am J Physiol* 2000; 279:H2568-73
40. Nosaka S, Kamaya H, Ueda I, Wong KC: Smooth muscle contraction and local anesthetics: Calmodulin-dependent myosin light-chain kinase. *Anesth Analg* 1989; 69:504-10
41. Mikawa K, Mackawa N, Hoshina H, Tanaka O, Shirakawa J, Goto R, Obara H, Kusunoki M: Inhibitory effect of barbiturates and local anaesthetics on protein kinase C activation. *J Int Med Res* 1990; 18:153-60
42. Sanbe A, Fewell JG, Gulick J, Osinska H, Lorenz J, Hall DG, Murray LA, Kimball TR, Witt SA, Robbins J: Abnormal cardiac structure and function in mice expressing nonphosphorylatable cardiac regulatory myosin light chain 2. *J Biol Chem* 1999; 274:21085-94
43. de Tombe PP, Stienen GJ: Protein kinase A does not alter economy of force maintenance in skinned rat cardiac trabeculae. *Circ Res* 1995; 76:734-41
44. Butterworth JF IV, Brownlow RC, Leith JP, Prielipp RC, Cole LR: Bupivacaine inhibits cyclic-3',5'-adenosine monophosphate production: A possible contributing factor to cardiovascular toxicity. *ANESTHESIOLOGY* 1993; 79:88-95
45. Dauphin A, Gupta RN, Young JE, Morton WD: Serum bupivacaine concentrations during continuous extrapleural infusion. *Can J Anaesth* 1997; 44:367-70
46. Bader AM, Tsen LC, Camann WR, Nephew E, Datta S: Clinical effects and maternal and fetal plasma concentrations of 0.5% epidural levobupivacaine versus bupivacaine for cesarean delivery. *ANESTHESIOLOGY* 1999; 90:1596-601
47. Weinberg GL, VadeBoncouer T, Ramaraju GA, Garcia-Amaro MF, Cwik MJ: Pretreatment or resuscitation with a lipid infusion shifts the dose-response to bupivacaine-induced asystole in rats. *ANESTHESIOLOGY* 1998; 88:1071-5
48. Miao N, Lynch C III: Effect of temperature on volatile anesthetic depression of myocardial contractions. *Anesth Analg* 1993; 76:366-71
49. Schulz CS, Salvatici RP, Standen DJ, Cabezas ME, Carpentier RG: Temperature-dependent inotropic effects of lignocaine and ethanol on rat heart papillary muscles. *Clin Exp Pharmacol Physiol* 1998; 25:913-8
